# Supplementary material for: Seasonal changes of buffalo colostrum: physicochemical parameters, fatty acids and cholesterol variation
Source: PubMed Central journal article supplement (PMC3604957; doi:10.1186/1752-153x-7-40), 2013-02-26
Supplement: 1752-153X-7-40-S1.pdf [file 1752-153X-7-40-S1.pdf]

## Supplementary material

**Table S1** - Statistical analysis of seasonal variation of the main physicochemical parameters of buffalo colostrum during first seven days *postpartum* (Friedman ANOVA – differences between days)

| Physicochemical parameters | change (day) | Overall (N = 10, df = 6) |          | Summer (N = 5, df = 6) |          | Winter (N = 5, df = 6) |          |
|----------------------------|--------------|--------------------------|----------|------------------------|----------|------------------------|----------|
|                            |              | $\chi^2$                 | P        | $\chi^2$               | P        | $\chi^2$               | P        |
| Fat                        | 4 ↓          | 59.61                    | < 0.0001 | 29.66                  | < 0.0001 | 30                     | < 0.0001 |
| Protein                    | 4 ↓          | 60                       | < 0.0001 | 30                     | < 0.0001 | 30                     | < 0.0001 |
| Lactose                    | 4 ↑          | 58.41                    | < 0.0001 | 29.31                  | < 0.0001 | 29.14                  | < 0.0001 |
| Total solids               | 4 ↓          | 60                       | < 0.0001 | 30                     | < 0.0001 | 30                     | < 0.0001 |
| Ash                        | 2 ↑          | 50.80                    | < 0.0001 | 26.77                  | 0.0002   | 25.18                  | 0.0003   |
| pH                         | 3 ↑          | 58.37                    | < 0.0001 | 29.91                  | < 0.0001 | 2862                   | < 0.0001 |

**Table S2** - Comparative analysis of the main physicochemical parameters of buffalo colostrum in summer and winter seasons (Wilcoxon Matched Pairs Test – summer vs. winter)

| Physicochemical parameters | Higher in | Z     | P        |
|----------------------------|-----------|-------|----------|
| Fat                        | summer    | 4.169 | < 0.0001 |
| Protein                    | summer    | 5.119 | < 0.0001 |
| Lactose                    | summer    | 4.324 | < 0.0001 |
| Total solids               | summer    | 4.078 | < 0.0001 |
| Ash                        | summer    | 5.086 | < 0.0001 |
| pH                         | summer    | 4.342 | < 0.0001 |

**Table S3** - Statistical analysis of seasonal variation of some fatty acids and cholesterol from buffalo colostrum during first seven days *postpartum* (Friedman ANOVA – differences between days)

| Acid                              | change  | Overall<br>(N = 10, df = 6) |          | Summer<br>(N = 5, df = 6) |          | Winter<br>(N = 5, df = 6) |          |
|-----------------------------------|---------|-----------------------------|----------|---------------------------|----------|---------------------------|----------|
|                                   |         | $\chi^2$                    | P        | $\chi^2$                  | P        | $\chi^2$                  | P        |
| <b>SFA</b>                        |         |                             |          |                           |          |                           |          |
| Butyric acid (C4:0)               | ↓       | 60                          | < 0.0001 | 30                        | < 0.0001 | 30                        | < 0.0001 |
| Caproic acid (C6:0)               | ↓       | 58.93                       | < 0.0001 | 30                        | < 0.0001 | 30                        | < 0.0001 |
| Caprylic acid (C8:0)              | ↓       | 58.16                       | < 0.0001 | 30                        | < 0.0001 | 28.46                     | < 0.0001 |
| Capric acid (C10:0)               | ↓       | 56.1                        | < 0.0001 | 30                        | < 0.0001 | 29.49                     | < 0.0001 |
| Lauric acid (C12:0)               | ↓       | 57.86                       | < 0.0001 | 30                        | < 0.0001 | 30                        | < 0.0001 |
| Myristic acid (C14:0)             | ↓       | 60                          | < 0.0001 | 30                        | < 0.0001 | 30                        | < 0.0001 |
| Pentadecylic acid (C15:0)         | ↓       | 55.82                       | < 0.0001 | 29.91                     | < 0.0001 | 30                        | < 0.0001 |
| Palmitic acid (C16:0)             | ↓       | 60                          | < 0.0001 | 30                        | < 0.0001 | 30                        | < 0.0001 |
| Margaric acid (C17:0)             | ↓       | 57.6                        | < 0.0001 | 28.97                     | < 0.0001 | 29.14                     | < 0.0001 |
| Stearic acid (C18:0)              | ↓       | 60                          | < 0.0001 | 30                        | < 0.0001 | 30                        | < 0.0001 |
| <b>MUFA</b>                       |         |                             |          |                           |          |                           |          |
| Myristoleic acid (C14:1)          | ↓       | 55.46                       | < 0.0001 | 29.23                     | < 0.0001 | 28.89                     | < 0.0001 |
| Cis-10-pentadecanoic acid (C15:1) | ↓       | 53.01                       | < 0.0001 | 27.09                     | < 0.0001 | 26.91                     | < 0.0001 |
| Palmitoleic acid (C16:1)          | ↓ day 4 | 54.21                       | < 0.0001 | 29.49                     | < 0.0001 | 27.77                     | 0.0001   |
| Oleic acid (C18:1)                | ↓       | 60                          | < 0.0001 | 30                        | < 0.0001 | 30                        | < 0.0001 |
| Elaidic acid (C18:1iso)           | ↓       | 58.59                       | < 0.0001 | 29.66                     | < 0.0001 | 29.49                     | < 0.0001 |
| <b>PUFA</b>                       |         |                             |          |                           |          |                           |          |
| Linoleic acid (C18:2)             | ↓       | 60                          | < 0.0001 | 30                        | < 0.0001 | 30                        | < 0.0001 |
| <b>Cholesterol</b>                | ↓       | 52.93                       | < 0.0001 | 29.66                     | < 0.0001 | 26.66                     | 0.0002   |

**Table S4** - Comparative analysis of some fatty acids and cholesterol from buffalo colostrum in summer and winter seasons (Wilcoxon Matched Pairs Test – summer vs. winter)

| Acid                              | Higher in | Z     | P        |
|-----------------------------------|-----------|-------|----------|
| <b>SFA</b>                        |           |       |          |
| Butyric acid (C4:0)               | summer    | 4.783 | < 0.0001 |
| Caproic acid (C6:0)               | summer    | 5.143 | < 0.0001 |
| Caprylic acid (C8:0)              | summer    | 4.39  | < 0.0001 |
| Capric acid (C10:0)               | summer    | 4.472 | < 0.0001 |
| Lauric acid (C12:0)               | summer    | 5.127 | < 0.0001 |
| Myristic acid (C14:0)             | summer    | 5.159 | < 0.0001 |
| Pentadecylic acid (C15:0)         | summer    | 3.522 | < 0.0001 |
| Palmitic acid (C16:0)             | summer    | 5.159 | < 0.0001 |
| Margaric acid (C17:0)             | summer    | 5.127 | < 0.0001 |
| Stearic acid (C18:0)              | summer    | 5.061 | < 0.0001 |
| <b>MUFA</b>                       |           |       |          |
| Myristoleic acid (C14:1)          | summer    | 5.159 | < 0.0001 |
| Cis-10-pentadecanoic acid (C15:1) | summer    | 2.488 | 0.0129   |
| Palmitoleic acid (C16:1)          | summer    | 5.012 | < 0.0001 |
| Oleic acid (C18:1)                | summer    | 5.159 | < 0.0001 |
| Elaidic acid (C18:1iso)           | summer    | 4.897 | < 0.0001 |
| <b>PUFA</b>                       |           |       |          |
| Linoleic acid (C18:2)             | summer    | 4.422 | < 0.0001 |
| <b>Cholesterol</b>                | summer    | 4.832 | < 0.0001 |

**Table S5** - Method validation for cholesterol quantification by HPLC-UV (n = 3)

| Sample            | mg/L | Recovery (%) |
|-------------------|------|--------------|
| <b>Intra-day</b>  | 40   | 98±5         |
|                   | 80   | 93±4         |
| <b>Interday</b>   | 40   | 96±4         |
|                   | 80   | 92±4         |
| <b>LOD (mg/L)</b> | 1.97 |              |
| <b>LOQ (mg/L)</b> | 6.56 |              |

LOD: limit of detection calculated with a signal to noise ratio 3 to 1

LOQ: limit of quantification calculated with a signal to noise ratio of 10 to 1
